# Supplementary material for: Impact of COVID-19 pandemic on utilisation of healthcare services: a systematic review
Source: HighWire-hosted journal article supplement (doi:10.1136/bmjopen-2020-045343), 2021-03-01
Supplement: bmjopen-2020-045343supp003_data_supplement.pdf [file bmjopen-2020-045343supp003_data_supplement.pdf]

### Supplementary File 3 – DATABASE SEARCH STRINGS

#### PubMed

("COVID-19"[Supplementary Concept] OR "COVID-19"[tiab] OR COVID19[tiab] OR "COVID 19"[tiab] OR "SARS-CoV-2"[tiab] OR "2019-nCoV"[tiab] OR "Novel coronavirus"[tiab] OR "Coronavirus 2019"[tiab] OR "Coronavirus 19"[tiab] OR "COVID 2019"[tiab] OR "2019 ncov"[tiab] OR "Wuhan coronavirus"[tiab])  
AND  
(((Pandemic[ti] OR Pandemics[ti] OR Outbreak[ti] OR Outbreaks[ti] OR Hospital[ti] OR Hospitals[ti] OR Emergency[ti] OR Surgery[ti] OR Surgical[ti] OR Department[ti] OR Departments[ti] OR Unit[ti] OR Units[ti] OR Clinic[ti] OR Clinics[ti] OR "Primary care"[ti]))  
AND  
(Admission[ti] OR Admissions[ti] OR Visit[ti] OR Visits[ti] OR Attendance[ti] OR Attending[ti] OR Activity[ti] OR Utilization[ti] OR Utilisation[ti] OR Impact[ti] OR Impacts[ti] OR Reduction[ti] OR Reductions[ti] OR Decrease[ti] OR Decreases[ti] OR Decreased[ti] OR Decline[ti] OR Declines[ti] OR Change[ti] OR Changes[ti] OR Increase[ti] OR Increases[ti] OR Increased[ti]))  
OR  
((Pandemic[tiab] OR Pandemics[tiab] OR Outbreak[tiab] OR Outbreaks[tiab]))  
AND  
(((Hospital[tiab] OR Hospitals[tiab] OR Emergency[tiab] OR Surgery[tiab] OR Surgical[tiab] OR Department[tiab] OR Departments[tiab] OR Unit[tiab] OR Units[tiab] OR Clinic[tiab] OR Clinics[tiab] OR "Primary care"[tiab] OR Telemedicine[tiab] OR Telehealth[tiab]))  
AND  
(Admission[tiab] OR Admissions[tiab] OR Visit[tiab] OR Visits[tiab] OR Attendance[tiab] OR Attending[tiab] OR Activity[tiab] OR Utilization[tiab] OR Utilisation[tiab]))  
OR  
(Prescriptions[tiab] OR Prescribed[tiab] OR Vaccinations[tiab] OR Imaging[tiab] OR Scans[tiab] OR Endoscopy[tiab] OR Endoscopic[tiab] OR Endoscopies[tiab]))  
AND  
(Impact[tiab] OR Impacts[tiab] OR Reduction[tiab] OR Reductions[tiab] OR Decrease[tiab] OR Decreases[tiab] OR Decreased[tiab] OR Decline[tiab] OR Declines[tiab] OR Changes[tiab] OR Increase[tiab] OR Increases[tiab] OR Increased[tiab]))

#### Embase (via Elsevier)

('coronavirus disease 2019'/exp OR COVID-19:ti,ab OR COVID19:ti,ab OR "COVID 19":ti,ab OR SARS-CoV-2:ti,ab OR 2019-nCoV:ti,ab OR "Novel coronavirus":ti,ab OR "Coronavirus 2019":ti,ab OR "Coronavirus 19":ti,ab OR "COVID 2019":ti,ab OR "2019 ncov":ti,ab OR "Wuhan coronavirus":ti,ab)  
AND  
(((Pandemic:ti OR Pandemics:ti OR Outbreak:ti OR Outbreaks:ti OR Hospital:ti OR Hospitals:ti OR Emergency:ti OR Surgery:ti OR Surgical:ti OR Department:ti OR Departments:ti OR Unit:ti OR Units:ti OR Clinic:ti OR Clinics:ti OR "Primary care":ti))  
AND  
(Admission:ti OR Admissions:ti OR Visit:ti OR Visits:ti OR Attendance:ti OR Attending:ti OR Activity:ti OR Utilization:ti OR Utilisation:ti OR Impact:ti OR Impacts:ti OR Reduction:ti OR Reductions:ti OR Decrease:ti OR Decreases:ti OR Decreased:ti OR Decline:ti OR Declines:ti OR Change:ti OR Changes:ti OR Increase:ti OR Increases:ti OR Increased:ti))  
OR  
((Pandemic:ti,ab OR Pandemics:ti,ab OR Outbreak:ti,ab OR Outbreaks:ti,ab))  
AND  
(((Hospital:ti,ab OR Hospitals:ti,ab OR Emergency:ti,ab OR Surgery:ti,ab OR Surgical:ti,ab OR

Department:ti,ab OR Departments:ti,ab OR Unit:ti,ab OR Units:ti,ab OR Clinic:ti,ab OR Clinics:ti,ab OR "Primary care":ti,ab OR Telemedicine:ti,ab OR Telehealth:ti,ab)

AND

(Admission:ti,ab OR Admissions:ti,ab OR Visit:ti,ab OR Visits:ti,ab OR Attendance:ti,ab OR Attending:ti,ab OR Activity:ti,ab OR Utilization:ti,ab OR Utilisation:ti,ab))

OR

(Prescriptions:ti,ab OR Prescribed:ti,ab OR Vaccinations:ti,ab OR Imaging:ti,ab OR Scans:ti,ab OR Endoscopy:ti,ab OR Endoscopic:ti,ab OR Endoscopies:ti,ab))

AND

(Impact:ti,ab OR Impacts:ti,ab OR Reduction:ti,ab OR Reductions:ti,ab OR Decrease:ti,ab OR Decreases:ti,ab OR Decreased:ti,ab OR Decline:ti,ab OR Declines:ti,ab OR Changes:ti,ab OR Increase:ti,ab OR Increases:ti,ab OR Increased:ti,ab))

### **Cochrane COVID-19 Study Register**

Pandemic OR Pandemics OR Outbreak OR Outbreaks

AND

(Hospital OR Hospitals OR Emergency OR Surgery OR Surgical OR Department OR Departments OR Unit OR Units OR Clinic OR Clinics OR "Primary care" OR Telemedicine OR Telehealth)

AND

(Admission OR Admissions OR Visit OR Visits OR Attendance OR Attending OR Activity OR Utilization OR Utilisation OR Prescriptions OR Prescribed OR Vaccinations OR Imaging OR Scans OR Endoscopy OR Endoscopic OR Endoscopies)

AND

(Impact OR Impacts OR Reduction OR Reductions OR Decrease OR Decreases OR Decreased OR Decline OR Declines OR Changes OR Increase OR Increases OR Increased)

### **Europe PMC preprints**

(COVID-19 OR COVID19 OR "COVID 19" OR SARS-CoV-2 OR 2019-nCoV OR "Novel coronavirus" OR "Coronavirus 2019" OR "Coronavirus 19" OR "COVID 2019" OR "2019 ncov" OR "Wuhan coronavirus")

AND

(Pandemic[ti] OR Pandemics[ti] OR Outbreak[ti] OR Outbreaks[ti])

AND

(Hospital OR Hospitals OR Emergency OR Surgery OR Surgical OR Department OR Departments OR Unit OR Units OR Clinic OR Clinics OR "Primary care" OR Telemedicine OR Telehealth)

AND

(Admission OR Admissions OR Visit OR Visits OR Attendance OR Attending OR Activity OR Utilization OR Utilisation OR Prescriptions OR Prescribed OR Vaccinations OR Imaging OR Scans OR Endoscopy OR Endoscopic OR Endoscopies)

AND

(Impact OR Impacts OR Reduction OR Reductions OR Decrease OR Decreases OR Decreased OR Decline OR Declines OR Changes OR Increase OR Increases OR Increased)
