# Supplementary material for: Impact of COVID-19 pandemic on utilisation of healthcare services: a systematic review
Source: PubMed Central journal article supplement — BMJ Open. 2021 Mar 16;11(3):e045343. doi: 10.1136/bmjopen-2020-045343 (PMC7969768; doi:10.1136/bmjopen-2020-045343), 2021-03-16
Supplement: bmjopen-2020-045343supp004.pdf [file bmjopen-2020-045343supp004.pdf]

|                 | Confounding - Extraneous events | Confounding - pre-interruption trends | Selection of participants | Outcome measurement | Selection of reported results |
|-----------------|---------------------------------|---------------------------------------|---------------------------|---------------------|-------------------------------|
| Abdulmalik      | ?                               | ○                                     | ?                         | +                   | +                             |
| Andersson       | +                               | -                                     | +                         | +                   | +                             |
| ANGOULVANT      | +                               | +                                     | ?                         | +                   | +                             |
| Antonucci       | ?                               | -                                     | ?                         | +                   | +                             |
| Athiel          | ?                               | -                                     | ?                         | +                   | +                             |
| Baum            | ?                               | ○                                     | ?                         | +                   | +                             |
| Bayles          | ?                               | ○                                     | +                         | +                   | +                             |
| Benazzo         | ?                               | -                                     | ?                         | ?                   | +                             |
| Bollmann        | ?                               | -                                     | ?                         | ?                   | +                             |
| Bozovich        | ?                               | -                                     | ?                         | ?                   | +                             |
| Braiteh         | ?                               | -                                     | ?                         | ?                   | +                             |
| Bramer          | ?                               | ○                                     | ?                         | ?                   | +                             |
| Butt            | ?                               | -                                     | ?                         | +                   | +                             |
| Cano-Valderrama | ?                               | -                                     | ?                         | +                   | +                             |
| Cheek           | ?                               | -                                     | ?                         | ?                   | +                             |
| Chou            | ?                               | -                                     | ?                         | ?                   | +                             |
| Claeys          | ?                               | ○                                     | +                         | +                   | +                             |
| Clerici         | ?                               | -                                     | ?                         | ?                   | ?                             |
| Collado-Mesa    | ?                               | ○                                     | ?                         | ?                   | +                             |
| CVD-COVID       | ?                               | -                                     | ?                         | ?                   | ?                             |
| De-Filippo      | ?                               | -                                     | ?                         | ?                   | +                             |
| de Havenon      | ?                               | ○                                     | ?                         | ?                   | +                             |
| De Rosa         | ?                               | -                                     | ?                         | ?                   | +                             |
| Diegoli         | +                               | -                                     | +                         | ?                   | +                             |
| Egol            | ?                               | -                                     | ?                         | -                   | +                             |
| Enache          | ?                               | -                                     | ?                         | +                   | +                             |
| Franco          | ?                               | -                                     | ?                         | ?                   | ?                             |
| Frankfurter     | ?                               | -                                     | ?                         | ?                   | +                             |
| Garcia          | ?                               | ○                                     | ?                         | ?                   | +                             |
| Gawron          | ?                               | ○                                     | ?                         | +                   | +                             |
| Giuntoli        | ?                               | -                                     | ?                         | +                   | +                             |
| Gruttadauria    | ?                               | ○                                     | ?                         | -                   | ?                             |
| Hartnett        | ?                               | -                                     | ?                         | +                   | +                             |
| Houshyar        | ?                               | -                                     | ?                         | ?                   | +                             |
| Hoyer           | ?                               | -                                     | ?                         | ?                   | +                             |
| Isba            | ?                               | -                                     | ?                         | ?                   | +                             |
| Jasne           | ?                               | -                                     | ?                         | ?                   | +                             |
| Kadavath        | ?                               | -                                     | ?                         | -                   | -                             |
| Kerleroux       | ?                               | -                                     | ?                         | +                   | +                             |
| Kessler         | ?                               | -                                     | ?                         | +                   | +                             |
| Kim             | ?                               | -                                     | ?                         | +                   | -                             |
| Kolbaek         | ?                               | -                                     | ?                         | ?                   | ?                             |
| Krenzlin        | ?                               | ○                                     | ?                         | +                   | +                             |
| Langdon-Embry   | ?                               | -                                     | ?                         | ?                   | ?                             |
| Lantelme        | ?                               | ○                                     | ?                         | ?                   | +                             |
| Lazaros         | ?                               | -                                     | ?                         | +                   | +                             |
| Lazzerini       | ?                               | ○                                     | ?                         | +                   | ?                             |
| Li              | ?                               | -                                     | ?                         | ?                   | ?                             |
| Lui             | ?                               | ○                                     | ?                         | +                   | +                             |
| Mafham          | +                               | -                                     | ?                         | +                   | +                             |
| Manzoni         | ?                               | -                                     | ?                         | ?                   | +                             |
| Mazzatenta      | ?                               | ○                                     | ?                         | ?                   | -                             |
| McDonald        | ?                               | -                                     | ?                         | +                   | +                             |
| Mitchell        | ?                               | +                                     | ?                         | +                   | +                             |
| Naidich         | +                               | -                                     | ?                         | +                   | +                             |
| Norbash         | ?                               | -                                     | ?                         | ?                   | -                             |
| Novara          | ?                               | -                                     | ?                         | ?                   | +                             |
| Onteddu         | ?                               | -                                     | ?                         | ?                   | +                             |
| Papafaklis      | ?                               | -                                     | ?                         | ?                   | +                             |
| Pignon          | ?                               | -                                     | ?                         | ?                   | +                             |
| Pinar           | ?                               | -                                     | ?                         | +                   | +                             |
| Polo Lopez      | ?                               | -                                     | ?                         | ?                   | +                             |
| Pop             | ?                               | -                                     | ?                         | ?                   | +                             |
| Qasim           | ?                               | -                                     | ?                         | +                   | +                             |
| Range           | ?                               | ○                                     | ?                         | ?                   | ?                             |
| Reeves          | ?                               | ○                                     | ?                         | ?                   | +                             |
| Requena         | ?                               | -                                     | ?                         | ?                   | ?                             |
| Romaguera       | ?                               | -                                     | ?                         | +                   | +                             |
| Salerno         | ?                               | -                                     | ?                         | ?                   | +                             |
| Santana         | ?                               | +                                     | ?                         | +                   | +                             |
| Scaramuzza      | ?                               | -                                     | ?                         | ?                   | ?                             |
| Scholz          | ?                               | ○                                     | ?                         | +                   | +                             |
| Secco           | ?                               | -                                     | ?                         | ?                   | +                             |
| Seiffert        | ?                               | -                                     | +                         | ?                   | +                             |
| Smalley         | ?                               | -                                     | ?                         | ?                   | +                             |
| Tinay           | ?                               | -                                     | ?                         | ?                   | +                             |
| Toro            | ?                               | ○                                     | ?                         | ?                   | ?                             |
| Toyoda          | ?                               | ○                                     | ?                         | ?                   | +                             |
| Wong            | ?                               | ○                                     | ?                         | ?                   | +                             |
| Xu              | ?                               | ○                                     | ?                         | ?                   | +                             |
| Zhao            | ?                               | -                                     | ?                         | ?                   | +                             |
